# Supplementary material
Source: PubMed Central journal article supplement (PMC8387368)
Supplement: NIHMS1721792-supplement-1.pdf [file NIHMS1721792-supplement-1.pdf]

# Supplementary Figure 1

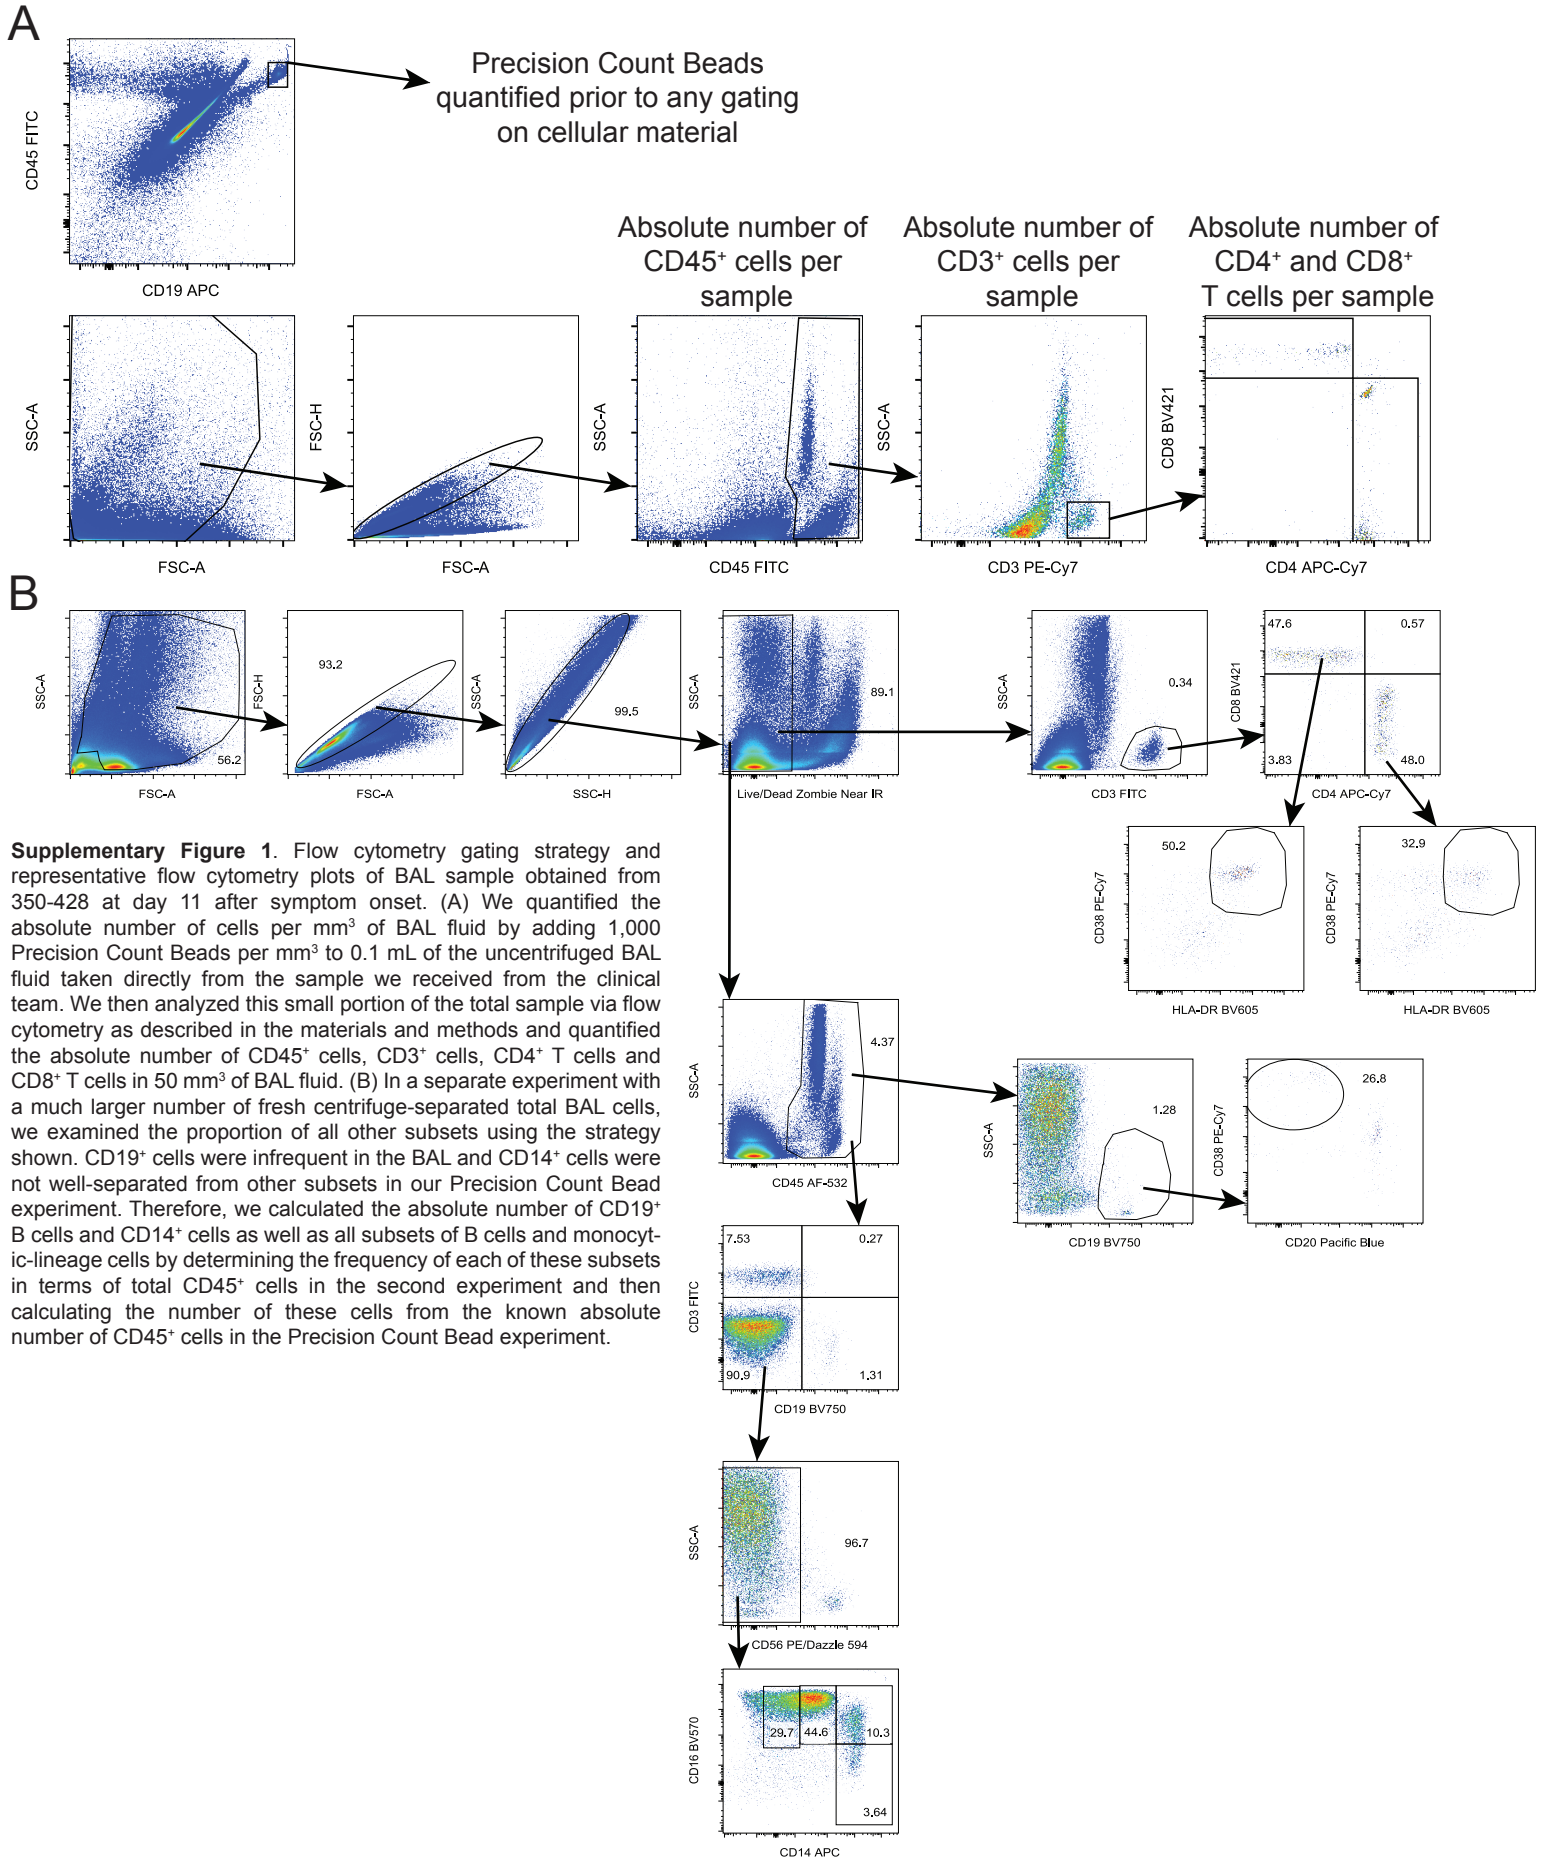

# Supplementary Figure 2

**A**

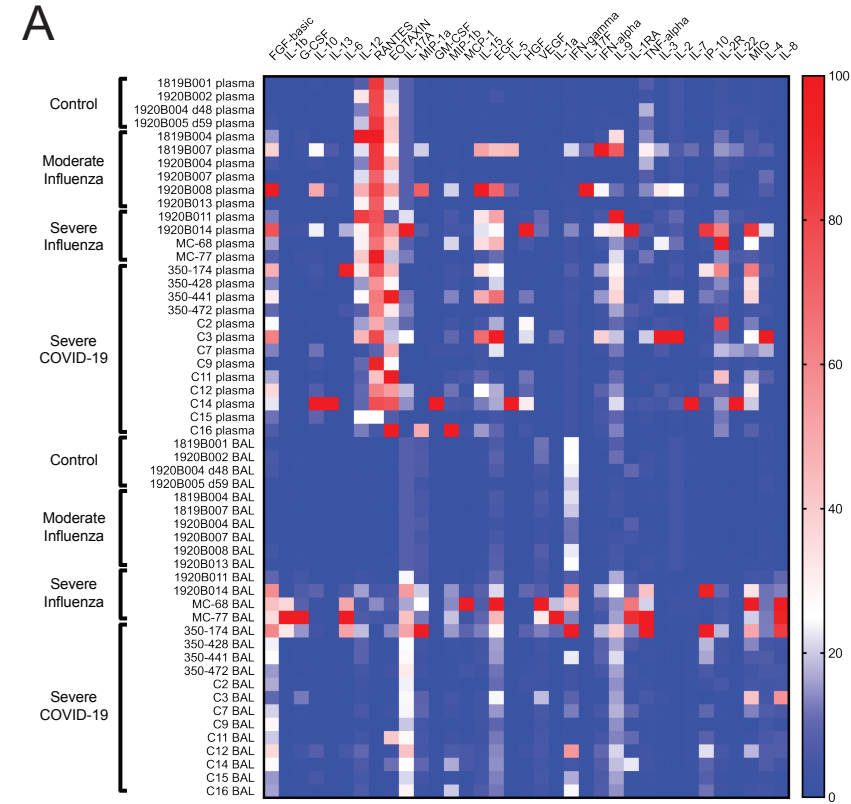

**B**

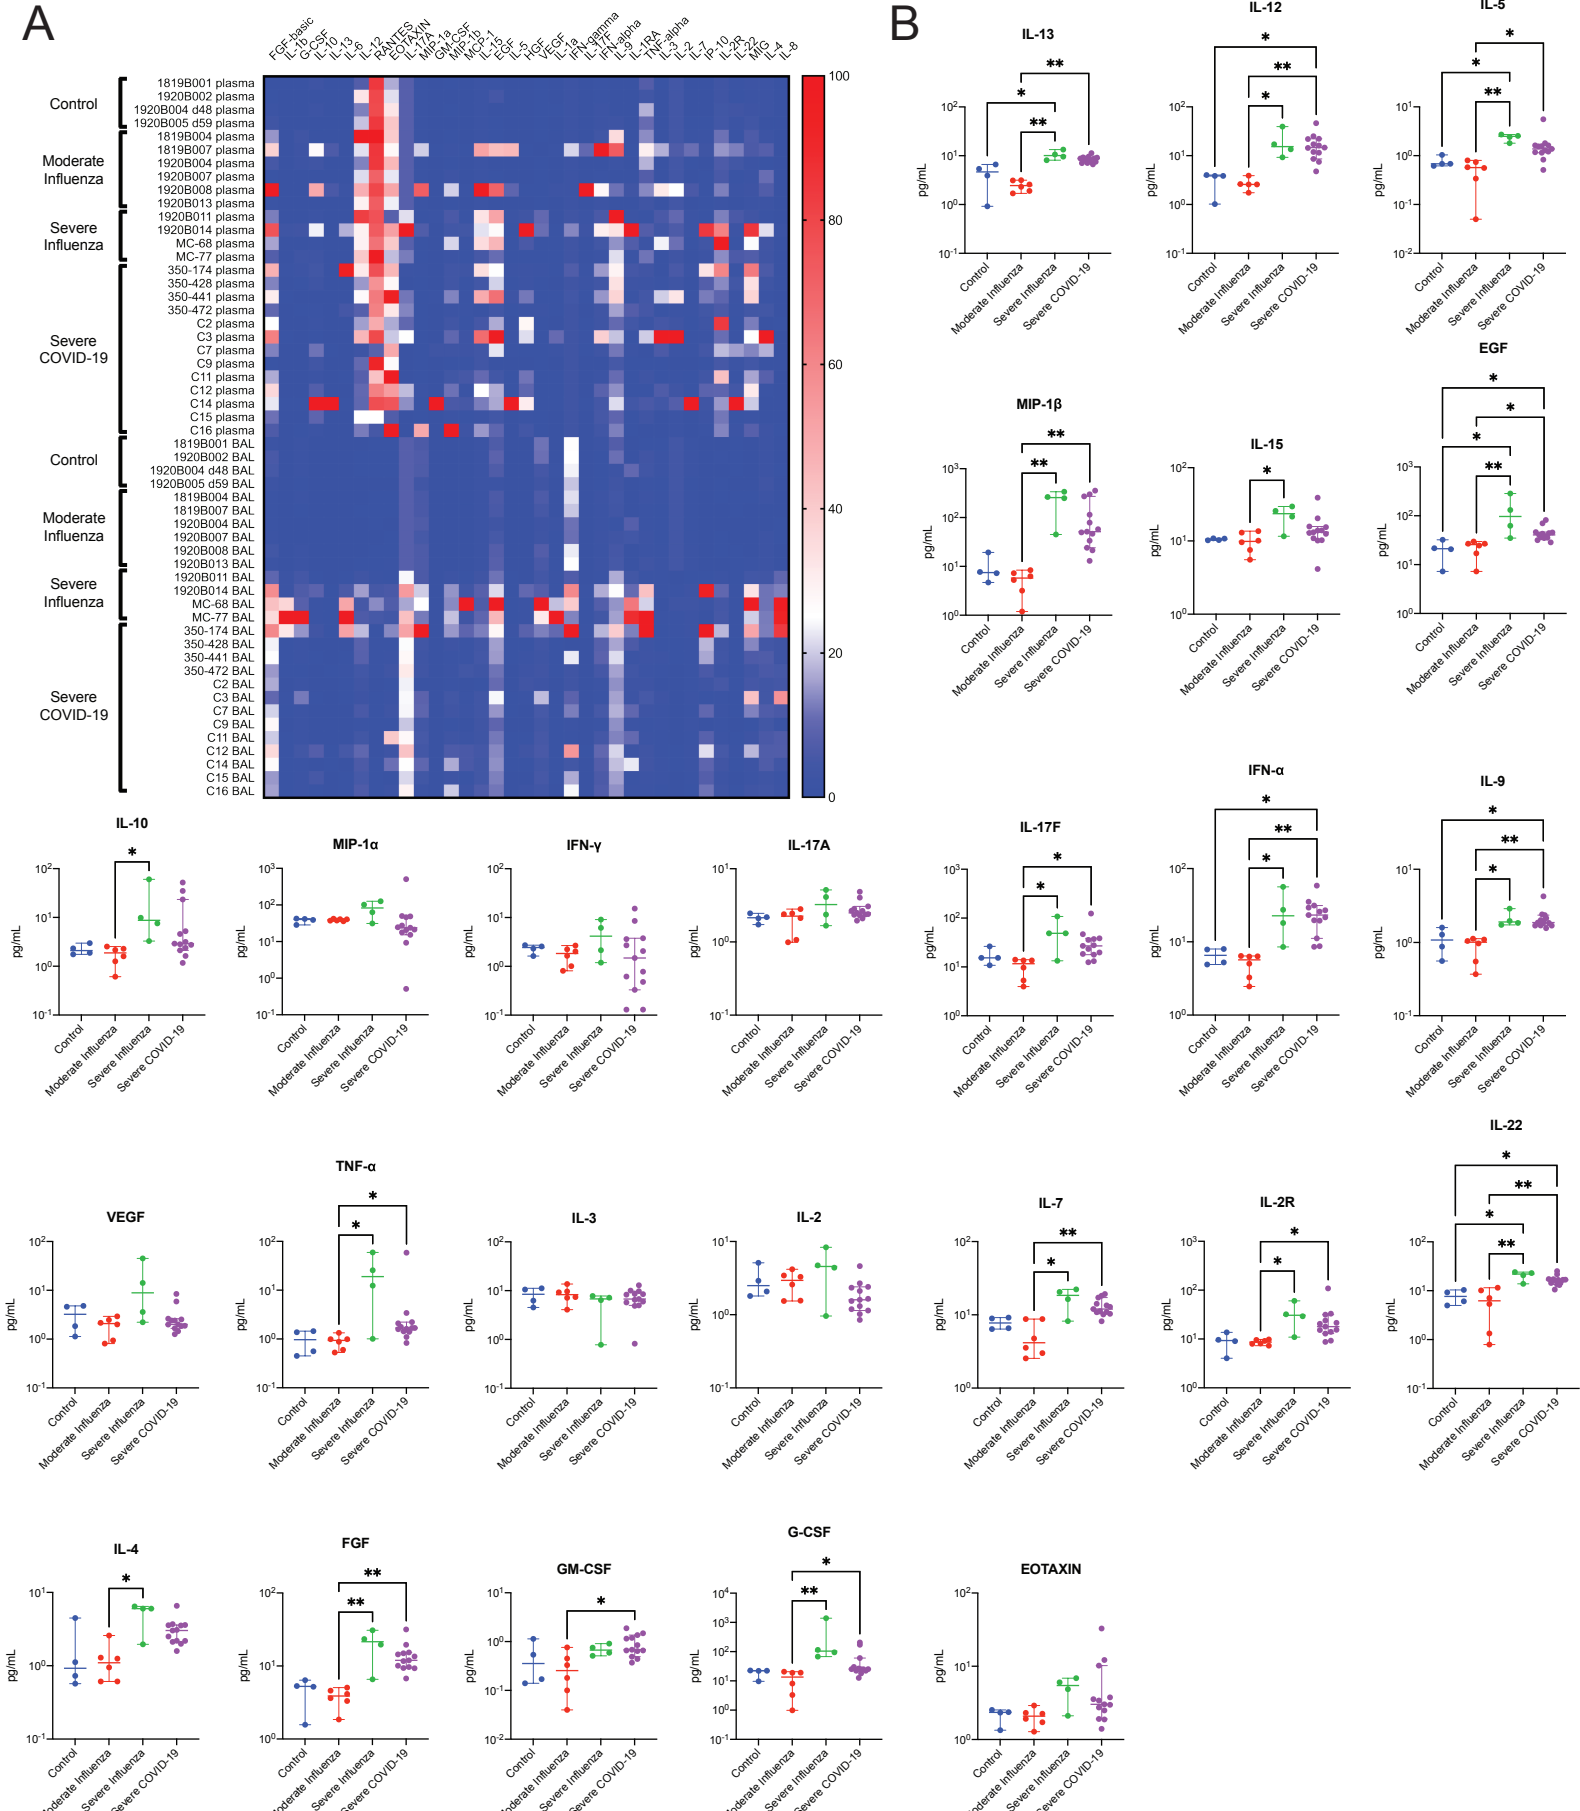

**Supplementary Figure 2.** Measured cytokine concentrations in all subjects. (A) Heat map visualization of cytokine concentrations in both the plasma and BAL. Plasma values are the top half of the heat map, BAL values are the bottom. Each individual column was normalized and the highest cytokine value set to 100 and the lowest to 0. (B) BAL cytokine concentrations for the remaining 25 measured cytokines not presented in Figure 3. Individual subject values are plotted (each point) along with the median group value (line) and the 95% confidence interval. Significance is indicated by \*  $P < 0.05$  and \*\*  $P < 0.005$ , with all testing performed using Kruskal-Wallis ANOVA with Dunn's multiple comparisons post-test.

# Supplementary Figure 3

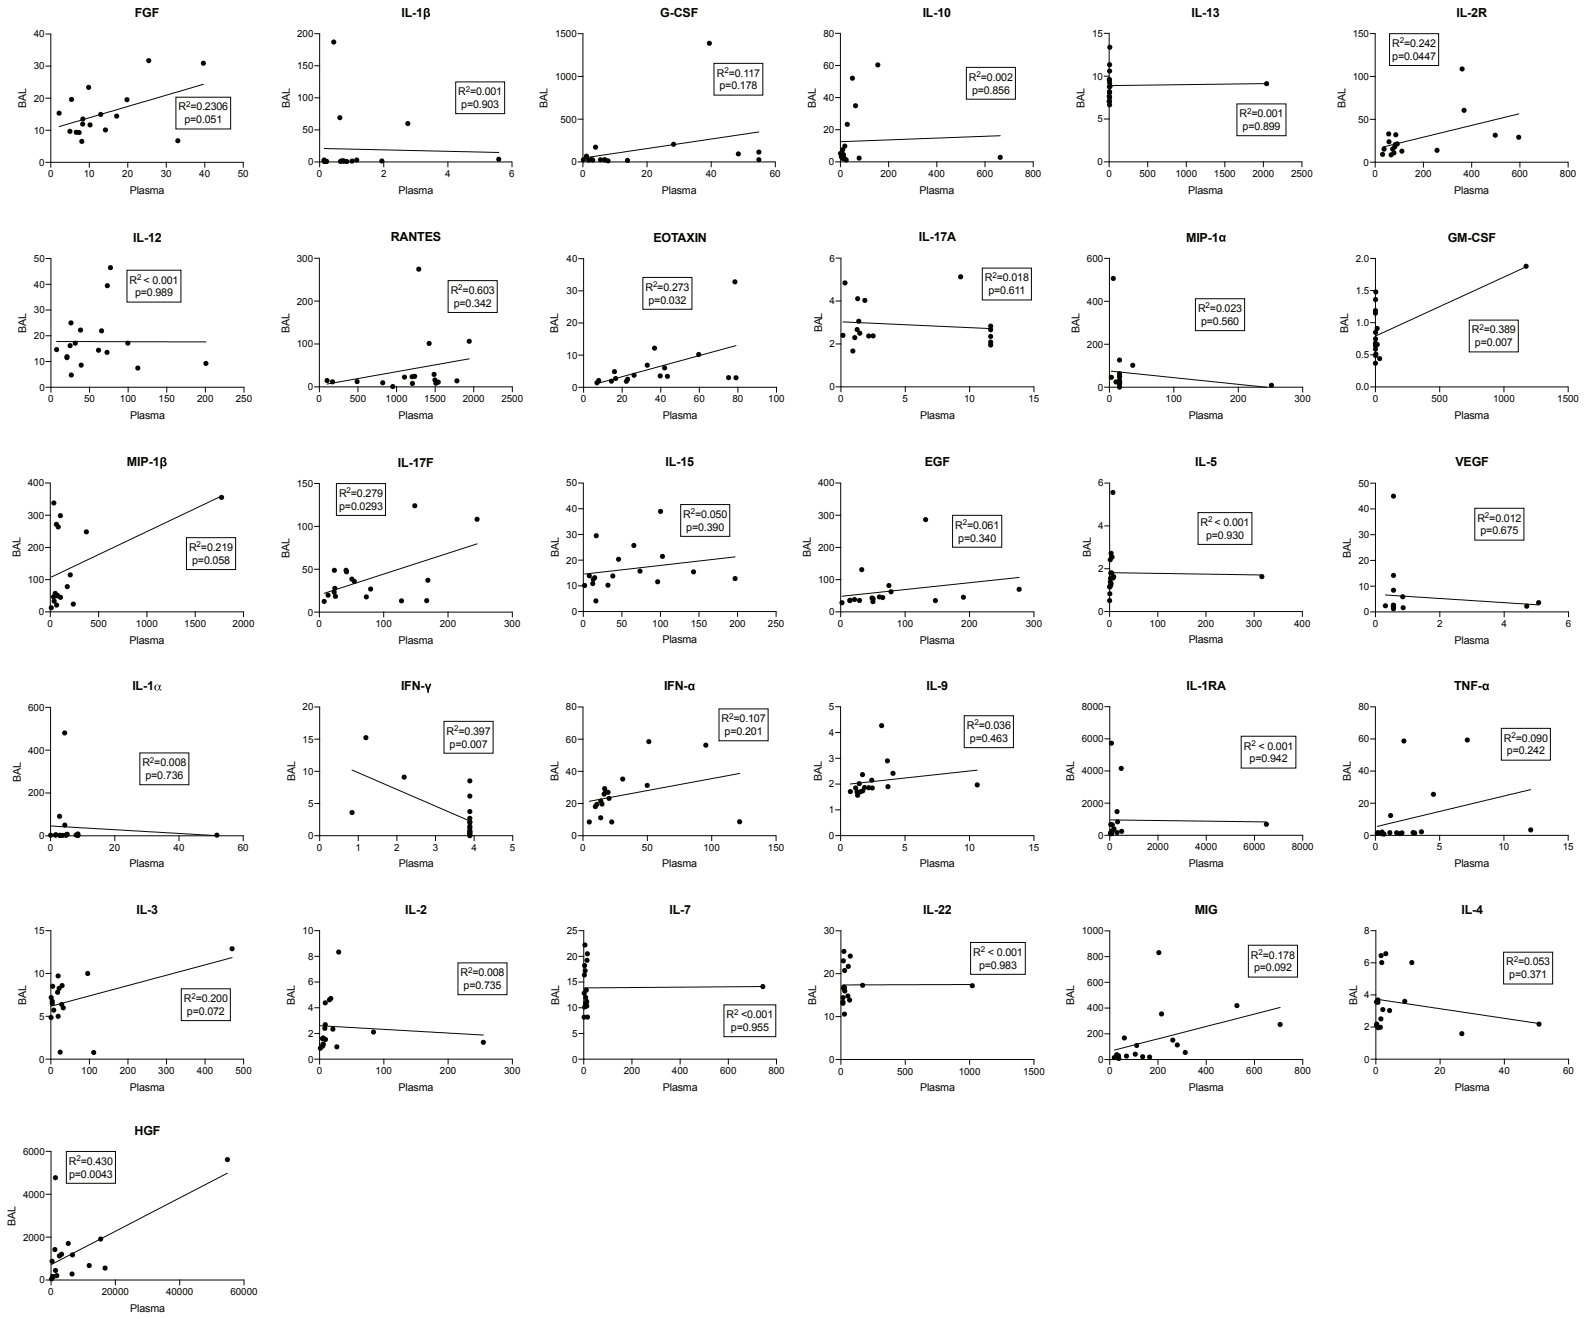

**Supplementary Figure 3.** Linear regression analysis for the remaining 31 cytokines not presented in Figure 4A. Plots represent blood plasma concentration on the x-axis and BAL concentration on the y-axis. All cytokine concentration units reported are in pg/mL. This analysis was performed using the initial sample from each of the individuals with severe COVID-19 and severe influenza (N=17). The P value threshold for significance was corrected to < 0.0015 using the Bonferroni method.
